# Supplementary material for: Ulvan Activates Chicken Heterophils and Monocytes Through Toll-Like Receptor 2 and Toll-Like Receptor 4
Source: Front Immunol. 2018 Nov 23;9:2725. doi: 10.3389/fimmu.2018.02725 (PMC6265352; doi:10.3389/fimmu.2018.02725)
Supplement: Supplemental Table 1 — Primers sequences and relative references. [file Table_1.XLSX]

## Sheet: sup table 1 primers
	Primers sequences and relative references
	Target	Sequence	Reference
	β-actin	F: 5’-CAACACAGTGCTGTCTGGTGGTA-3’	Barjesteh, N., Behboudi, S., Brisbin, J.T., Villanueva, A.I., Nagy, E., Sharif, S. TLR Ligands Induce Antiviral Responses in Chicken Macrophages. PloSOne (2014) 9: e105713. [25]
		R: 5’-ATCGTACTCCTGCTTGCTGATCC-3’
	IL1β	F: 5’-GTGAGGCTCAACATTGCGCTGTA-3
		R: 5’-TGTCCAGGCGGTAGAAGATGAAG-3’
	IFNα	F: 5’-ATCCTGCTGCTCACGCTCCTTCT-3
		R: 5’-GGTGTTGCTGGTGTCCAGGATG-3’
	IFNβ	F: 5’-GCCTCCAGCTCCTTCAGAATACG-3’
		R: 5’-CTGGATCTGGTTGAGGAGGCTGT-3’
	IFNγ	F: 5’-ACACTGACAAGTCAAAGCCGCACA-3'
		R: 5’-AGTCGTTCATCGGGAGCTTGGC-3’
	2'-5' Oligoadenylate synthase (OAS)	F:5’-AGAACTGCAGAAGAACTTTGTC-3’
		R:5’-GCTTCAACATCTCCTTGTACC-3’
	IL8	F: 5'-CCAAGCACACCTCTCTTCCA-3'	St. Paul, M., Mallick, A.I., Haqa, K., Oroujia, S., Abdul-Careemb, M.F., Sharif, S. In vivo administration of ligands for chicken toll-like receptors 4 and 21 induces the expression of immune system genes in the spleen. Vet. Immunol. Immunopath. (2011) 144: 228-237. doi:10.1016/j.vetimm.2011.09.004 [48]
		R: 5'-GCAAGGTAGGACGCTGGTAA-3'
	IL10	F: 5'-AGCAGATCAAGGAGACGTTC-3'
		R: 5'-ATCAGCAGGTACTCCTCGAT-3'
	IL13	F: 5'-ACTTGTCCAAGCTGAAGCTGTC-3'
		R: 5'-TCTTGCAGTCGGTCATGTTGTC-3'
	iNOS	F: 5' -GGCAGCAGCGTCTCTATGACTTG-3 '
		R: 5'-GACTTTAGGCTGCCCAGGTTG-3'
	TLR2	F: 5’- ATCCTGCTGGAGCCCATTCAGAG-3’	St Paul, M., Barjesteh, N., Paolucci, S., Pei, Y., Sharif, S. Toll-like receptor ligands induce the expression of interferon-gamma and interleukin-17 in chicken CD4+ T cells. BMC Research Notes (2012) 5:616
		R: 5’- TTGCTCTTCATCAGGAGGCCACTC-3’
	TLR4	F: 5’- TGCCATCCCAACCCAACCACAG-3’
		R: 5’- ACACCCACTGAGCAGCACCAA-3’
	IL17	F: 5'CACTGCTGTTGGTGTTGCT-3'
		R:5'TCAGCAACCAAGCGGGGG-3
	IL18	F: 5'-GGA ATG CGA TGC CTT TTG3'	Cytokine response to the RSV antigen delivered by dendritic cell-directed vaccination in congenic chicken lines. Mucksová,J., Plachý, J., Staněk, O., Hejnar, J., Kalina, J., Barbora, B. et al. Vet Res. 2017; 48: 18.
		R :5' ATT TTC CCA TGC TCT TTC TCA3'

## Sheet: sup tab2 het in vitro
		Heterophils, fold changes, t= 2h
		IL10	IL13	IL17	IFNβ
	No addition	0.97 +/- 0.04	1.00 +/- 0.07	1.06 +/- 0.07	1.05 +/- 0.5
	Glycogen 10µg/ml	1.00 +/- 0.10	1.00 +/-0.09	1.00 +/- 0.09	1.01 +/- 0.11
	Ulvan 10µg/ml	1.10 +/- 0.14	1.16 +/- 0.12	1.19 +/- 0.05	1.14 +/- 0.06
	Ulvan 25µg/ml	1.24 +/- 0.06	1.16 +/- 0.05	1.14 +/- 0.12	1.10 +/- 0.03
	Ulvan 50µg/ml	1.18 +/- 0.18	1.30 +/- 0.26	1.10 +/- 0.06	1.36 +/- 0.17
		Heterophils, fold changes, t= 4h
		IL10	IL13	IL17	IFNβ
	No addition	1.01 +/- 0.04	0.98 +/- 0.05	0.97 +/- 0.07	0.96 +/- 0.04
	Glycogen 10µg/ml	0.98 +/- 0.09	0.97 +/- 0.11	0.94 +/- 0.11	0.98 +/- 0.09
	Ulvan 10µg/ml	1.17 +/- 0.05	1.09 +/- 0.12	1.02 +/- 0.05	1.16 +/- 0.21
	Ulvan 25µg/ml	1.28 +/- 0.09	1.08 +/- 0.02	0.96 +/- 0.06	1.12 +/- 0.11
	Ulvan 50µg/ml	1.10 +/- 0.14	0.98 +/- 0.11	0.95 +/- 0.09	1.31 +/- 0.14

## Sheet: sup tab3 mono in vitro
		Monocytes, fold changes, t= 2h
		IL10	IL17	IL18	IFNβ
	No addition	0.98 +/- 0.01	0.98 +/- 0.03	0.93 +/- 0.03	0.96 +/- 0.03
	Glycogen, 10µg/ml	1.03 +/- 0.05	0.96 +/- 0.05	0.96 +/- 0.05	0.99 +/- 0.06
	Ulvan, 10 µg/ml	0.98 +/- 0.04	1.00 +/- 0.09	0.97 +/- 0.09	0.98 +/- 0.05
	Ulvan, 20 µg/ml	1.20 +/- 0.03	1.25 +/- 0.13	0.96 +/- 0.85	0.95 +/- 0.04
	Ulvan, 50 µg/ml	1.18 +/- 0.13	1.22 +/- 0.15	1.05 +/- 0.07	0.97 +/- 0.05
		Monocytes, fold changes, t= 4h
		IL10	IL17	IL18	IFNβ
	No addition	0.88 +/- 0.03	1.00 +/- 0.07	0.88 +/- 0.06	0.97 +/- 0.06
	Glycogen, 10µg/ml	0.62 +/- 0.05	1.00 +/- 0.09	0.91 +/- 0.08	0.97 +/- 0.04
	Ulvan, 10 µg/ml	1.18 +/- 0.19	0.891 +/- 0.10	0.99 +/- 0.09	0.99 +/- 0.53
	Ulvan, 20 µg/ml	1.62 +/- 0.18	0.98 +/- 0.09	1.49 +/- 0.15	1.19 +/- 0.05
	Ulvan, 50 µg/ml	2.42 +/- 0.21	1.12 +/- 0.11	2.43 +/- 0.15	1.41 +/- 0.13

## Sheet: sup table 4 animals weight  
			Experimental data (weight)				Genetics company standard *
			Ulvan 0mg/l	Ulvan 10mg/l	Ulvan 25mg/l	Ulvan 50mg/l
	In vivo Trial 1	Day 0	1.321kg +/- 0.03	1.325kg +/- 0.04	1.323kg +/- 0.04	1.325kg +/- 0.04	1.328kg
		Day3	1.483 kg +/- 0.04	1.489kg +/- 0.04	1.475kg +/- 0.03	1.483kg +/- 0.04	1.481kg
	In vivo Trial 2	Day 0	1.327kg +/- 0.04	1.327kg +/- 0.04	1.319 +/- 0.07	1.328kg +/- 0.04	1.328kg
		Day3	1.49kg +/- 0.04	1.481kg +/- 0.05	1.408kg +/- 0.03	1.486kg +/- 0.04	1.481kg
	In vivo Trial 3	Day 0	1.328kg +/- 0.04	1.325 +/- 0.06	1.321kg +/- 0.07	1.327kg +/- 0.05	1.328kg
		Day3	1.48kg +/- 0.04	1.481kg +/- 0.04	1.476kg +/- 0.05	1.483kg +/- 0.06	1.481kg
		* The company does not provide standard deviation values.

## Sheet: sup tab5 het in vivo
	Day 1, fold changes, heterophils
		IL10	IL13	IL17	IL18	IFN-β
	Ulvan 0mg/l	1.31 +/- 0.16	1.32 +/- 0.16	1.29 +/- 0.20	1.19 +/- 0.22	1.43 +/- 0.21
	Ulvan 10mg/l	1.06 +/- 0.12	1.27 +/- 0.18	1.16 +/- 0.15	1.08 +/- 0.14	1.45 +/- 0.18
	Ulvan 25mg/l	1.21 +/- 0.18	1.21 +/- 0.15	1.18 +/- 0.19	1.23 +/-0.17	1.60 +/- 0.20
	Ulvan 50mg/l	0.97 +/- 0.15	1.32 +/- 0.18	1.20 +/- 0.24	1.14 +/- 0.13	2.07 +/- 0.34
	Day 2, fold changes, heterophils
		IL10	IL13	IL17	IL18	IFN-β
	Ulvan 0mg/l	1.44 +/- 0.23	1.63 +/- 0.19	1.35 +/- 0.24	1.57 +/- 0.23	1.46 +/- 0.22
	Ulvan 10mg/l	1.59 +/- 0.27	1.71 +/- 0.30	1.60 +/- 0.30	1.55 +/- 0.22	1.54 +/- 0.22
	Ulvan 25mg/l	1.47 +/- 0.22	1.65 +/- 0.27	1.33 +/- 0.24	1.67 +/- 0.25	1.44 +/- 0.29
	Ulvan 50mg/l	1.46 +/- 0.21	1.44 +/- 0.20	1.32 +/- 0.16	1.94 +/- 0.46	1.41 +/- 0.19
	Day 3, fold changes, heterophils
		IL10	IL13	IL17	IL18	IFN-β
	Ulvan 0mg/l	0.96 +/- 0.20	1.11 +/- 0.12	1.50 +/- 0.20	1.45 +/- 0.18	1.42 +/- 0.25
	Ulvan 10mg/l	0.82 +/- 0.10	1.06 +/- 0.17	1.57 +/- 0.22	1.35 +/- 0.16	1.37 +/- 0.21
	Ulvan 25mg/l	0.90 +/- 0.14	1.04 +/- 0.17	1.46 +/- 0.20	1.29 +/- 0.14	1.27 +/- 0.23
	Ulvan 50mg/l	0.79 +/- 0.12	0.99 +/- 0.14	1.49 +/- 0.17	1.39 +/- 0.14	1.33 +/- 0.16

## Sheet: sup tab6 control heteros
			Mean +/- SEM
			Ct actin	∆Ct IL1	∆Ct IFNα	∆Ct IFNβ	∆Ct IFNγ	∆Ct IL8	∆Ct IL10	∆Ct IL13	∆Ct IL18	∆Ct IL17	∆Ct TLR2	∆Ct TLR4
		Experiment 1	18.69 /- 0.03	13.89 +/- 0.04	15.59 +/- 0.13	17.73 +/- 0.09	16.54 +/- 0.06	19.57 +/- 0.11	18.58 +/- 0.08	18.66 +/- 0.05	19.44 +/- 0.10	19.61 +/- 0.06	13.73 +/- 0.05	8.48 +/- 0.07
		Experiment 2	18.66 +/- 0.02	13.79 +/- 0.02	15.56 +/- 0.07	17.52 +/- 0.10	16.53 +/- 0.04	19.59 +/- 0.10	18.64 +/- 0.04	18.64 +/- 0.08	19.36 +/- 0.05	19.62 +/- 0.04	13.68 +/- 0.05	8.57 +/- 0.11
	In vitro	Experiment 3	18.78 +/- 0.02	13.80 +/- 0.03	15.52 +/- 0.05	17.71 +/- 0.07	16.39 +/- 0.09	19.53 +/- 0.11	18.60 +/- 0.06	18.69 +/- 0.05	19.50 +/- 0.08	19.60 +/- 0.08	13.74 +/- 0.07	8.49 +/- 0.04
		Experiment 4	18.70 +/- 0.02	13.81 +/- 0.06	15.55 +/- 0.03	17.57 +/- 0.04	16.56 +/- 0.06	19.60 +/- 0.06	18.63 +/- 0.0.7	18.68 +/- 0.04	19.48 +/- 0.07	19.62 +/- 0.04	13.79 +/- 0.05	8.47 +/- 0.07
		Experiment 5	18.75 +/- 0.02	13.74 +/- 0.04	15.47 +/- 0.04	17.53 +/- 0.06	16.48 +/- 0.08	19.54 +/- 0.02	18.63 +/- 0.07	18.71 +/- 0.06	19.42 +/- 0.02	19.59 +/- 0.05	13.77 +/- 0.06	8.51 +/- 0.08
	In vivo Trial 1	Day 0	18.68 +/- 0.05	13.80 +/- 0.06	15.56 +/- 0.10	17.52 +/- 0.11	16.48 +/- 0.11	19.52 +/- 0.13	18.56 +/- 0.09	18.68 +/- 0.09	19.42 +/- 0.10	19.59 +/- 0.08	13.68 +/- 0.08	8.46 +/- 0.07
		Day1	18.61 +/- 0.12	13.81 +/- 0.09	15.48 +/- 0.11	17.61 +/- 0.09	16.53 +/- 0.08	19.54 +/- 0.10	18.57 +/- 0.05	18.64 +/- 0.09	19.34 +/- 0.07	19.61 +/- 0.08	13.67 +/- 0.07	8.46 +/- 0.08
		Day2	18.73 +/- 0.06	13.82 +/- 0.09	15.51 +/- 0.09	17.59 +/- 0.10	16.57 +/- 0.11	19.48 +/- 0.11	18.58 +/- 0.09	18.60 +/- 0.08	19.41 +/- 0.09	19.60 +/- 0.10	13.72 +/- 0.09	8.51 +/- 0.08
		Day3	18.71 +/- 0.06	13.76 +/- 0.08	15.47 +/- 0.08	17.55 +/- 0.09	16.38 +/- 0.011	19.53 +/- 0.07	18.59 +/- 0.08	18.71 +/- 0.12	19.38 +/- 0.09	19.64 +/- 0.05	13.70 +/- 0.08	8.43 +/- 0.08
	In vivo Trial 2	Day 0	18.61 +/- 0.04	13.77 +/- 0.07	15.60 +/- 0.09	17.71 +/- 0.10	16.49 +/- 0.08	19.59 +/- 0.10	18.64 +/- 0.08	18.70 +/- 0.11	19.44 +/- 0.06	19.60 +/-0.09	13.76 +/- 0.09	8.46 +/- 0.07
		Day1	18.67 +/- 0.03	13.84 +/- 0.05	15.53 +/- 0.07	17.72 +/- 0.07	16.38 +/- 0.08	19.59 +/- 0.09	18.64 +/- 0.09	18.71 +/- 0.06	19.37 +/- 0.06	19.60 +/- 0.04	13.72 +/- 0.08	8.52+/- 0.06
		Day2	18.71 +/- 0.08	13.74 +/- 0.010	15.56 +/- 0.08	17.71 +/- 0.09	16.48 +/- 0.10	19.59 +/- 0.09	18.65 +/- 0.09	18.73 +/- 0.09	19.27 +/- 0.05	19.62 +/- 0.08	13.74 +/- 0.09	8.49 +/- 0.10
		Day3	18.68 +/- 0.04	13.73 +/- 0.06	15.54 +/- 0.09	17.66 +/- 0.09	16.49 +/- 0.11	19.62 +/- 0.08	18.61 +/- 0.08	18.68 +/- 0.07	19.38 +/- 0.08	19.59 +/- 0.07	13.69 +/- 0.08	8.53 +/- 0.09
	In vivo Trial 3	Day 0	18.72 +/- 0.01	13.86 +/- 0.06	15.55 +/- 0.02	17.67 +/- 0.06	16.54 +/- 0.06	19.57 +/- 0.10	18.65 +/- 0.05	18.67 +/- 0.07	19.44 +/- 0.06	19.61 +/- 0.07	13.70 +/- 0.06	8.48 +/- 0.08
		Day1	18.65 +/- 0.05	13.81 +/- 0.09	15.53 +/- 0.08	17. 66 +/- 0.05	16.48 +/- 0.03	19.53 +/- 0.10	18.65 +/- 0.03	18.71 +/- 0.04	19.40 +/- 0.07	19.57 +/- 0.09	13.71 +/- 0.09	8.46 +/- 0.09
		Day2	18.69 +/- 0.08	13.84 +/- 0.07	15.54 +/- 0.08	17.63 +/- 0.100	16.51 +/- 0.07	19.56 +/- 0.09	18.64 +/- 0.09	18.68 +/- 0.08	19.47 +/- 0.06	19.60 +/- 0.09	13.67 +/- 0.11	8.47 +/- 0.06
		Day3	18.75 +/- 0.04	13.85 +/- 0.05	15.49 +/- 0.08	17.71 +/- 0.10	16.53 +/- 0.11	19.57 +/- 0.10	18.63 +/- 0.10	18.71 +/- 0.08	19.48 +/- 0.07	19.60 +/- 0.09	13.68 +/- 0.08	8.47 +/-0.08

## Sheet: sup tab7 mono in vivo
		Day 1, fold changes, monocytes
		IL10	IL13	IL17	IL18	IFNβ
	Ulvan 0mg/l	1.22 +/- 0.14	1.08 +/- 0.11	1.09 +/- 0.09	1.03 +/- 0.07	1.15 +/- 0.10
	Ulvan 10mg/l	1.09 +/- 0.14	1.07 +/- 0.09	1.02 +/- 0.07	1.07 +/- 0.07	1.06 +/- 0.14
	Ulvan 25mg/l	1.07 +/- 0.12	1.10 +/- 0.12	1.10 +/- 0.10	1.09 +/- 0.06	1.08 +/- 0.09
	Ulvan 50mg/l	1.08 +/- 0.10	0.99 +/- 0.09	1.01 +/- 0.08	1.27 +/- 0.09	1.34 +/- 0.23
		Day 2, fold changes, monocytes
		IL10	IL13	IL17	IL18	IFNβ
	Ulvan 0mg/l	1.08 +/- 0.11	1.04 +/ 0.09	1.08 +/- 0.06	1.05 +/- 0.08	1.05 +/- 0.08
	Ulvan 10mg/l	1.02 +/- 0.09	1.02 +/-0.08	1.09 +/- 0.11	1.02 +/- 0.06	0.99 +/- 0.12
	Ulvan 25mg/l	1.00 +/- 0.09	1.04 +/- 0.07	1.15 +/- 0.10	0.93 +/- 0.05	1.06 +/- 0.07
	Ulvan 50mg/l	1.01 +/- 0.07	0.98 +/- 0.06	1.10 +/- 0.08	1.87 +/- 0.16	1.15 +/- 0.16
		Day, fold changes, monocytes
		IL10	IL13	IL17	IL18	IFNβ
	Ulvan 0mg/l	1.09 +/- 0.11	1.05 +/- 0.08	1.08 +/- 0.09	0.99 +/- 0.08	1.07 +/- 0.11
	Ulvan 10mg/l	1.05 +/- 0.10	1.06 +/- 0.13	1.06 +/- 0.11	1.01 +/- 0.09	1.08 +/- 0.12
	Ulvan 25mg/l	1.02 +/- 0.11	1.04 +/- 0.09	1.02 +/- 0.08	0.89 +/- 0.13	1.04 +/- 0.07
	Ulvan 50mg/l	1.06 +/- 0.12	0.97 +/- 0.05	1.05 +/- 0.11	0.90 +/- 0.08	1.21 +/- 0.19

## Sheet: sup tab8 control monos
			Mean +/- SEM
			Ct actin	∆Ct IL1	∆Ct IFNα	∆Ct IFNβ	∆Ct IFNγ	∆Ct IL8	∆Ct IL10	∆Ct IL13	∆Ct IL18	∆Ct IL17	∆Ct TLR2	∆Ct TLR4
		Experiment 1	19.44 +/- 0.02	16.82 +/- 0.07	16.47+/- 0.03	17.71 +/- 0.04	19.13 +/- 0.05	15.37 +/- 0.07	15.56 +/- 0.08	17.29 +/- 0.06	20.16 +/- 0.04	19.38 +/- 0.05	13.96 +/- 0.09	14.34 +/- 0.10
		Experiment 2	19.48 +/- 0.02	16.73 +/- 0.06	16.45 +/- 0.03	17.64 +/- 0.02	19.18 +/- 0.04	15.30 +/- 0.03	15.44 +/- 0.09	17.11 +/- 0.05	20.41 +/- 0.03	19.23 +/- 0.03	13.78 +/- 0.06	14.35 +/- 0.09
	In vitro	Experiment 3	19.42 +/- 0.02	16.85 +/- 0.03	16.37 +/- 0.04	17.62 +/- 0.03	19.04 +/- 0.05	15.33 +/- 0.03	15.41 +/- 0.08	17.07 +/- 0.07	20.36 +/- 0.05	19.28 +/- 0.04	13.48 +/- 0.10	14.29 +/- 0.08
		Experiment 4	19.44 +/- 0.03	16.66 +/- 0.09	16.40 +/- 0.06	17.53 +/- 0.09	19.29 +/- 0.10	15.59 +/- 0.11	15.45 +/- 0.10	17.37 +/- 0.09	20.29 +/- 0.07	19.41 +/- 0.03	13.46 +/- 0.09	14.24 +/- 0.06
		Experiment 5	19.45 +/- 0.04	16.83 +/- 0.04	16.34 +/- 0.02	17.37 +/- 0.09	19.26 +/- 0.06	15.25 +/- 0.08	15.28 +/- 0.06	17.55 +/- 0.08	19.95 +/- 0.08	19.52 +/- 0.09	13.61 +/- 0.06	14.32 +/- 0.08
	In vivo Trial 1	Day 0	19.43 +/- 0.08	16.68 +/- 0.06	16.46 +/- 0.08	17.59 +/- 0.10	19.29 +/- 0.05	15.33 +/- 0.06	15.49 +/-0.07	17.33 +/- 0.08	20.24 +/- 0.08	19.46 +/- 0.10	13.47 +/- 0.05	14.35 +/- 0.06
		Day1	19.44 +/-0.03	16.70 +/- 0.07	16.47 +/- 0.05	17.56 +/- 0.09	19.23 +/- 0.04	15.28 +/- 0.05	15.42 +/- 0.08	17.15 +/- 0.07	20.01 +/- 0.09	19.32 +/- 0.08	13.66 +/- 0.06	14.27 +/- 0.10
		Day2	19.45 /- 0.02	16.76 +/- 0.05	16.45 +/- 0.02	17.66 +/- 0.06	19.13 +/- 0.03	15.37 +/- 0.08	15.50 +/- 0.05	17.30 +/- 0.05	19.98 +/- 0.04	19.43 +/- 0.06	13.51 +/- 0.07	14.29 +/- 0.03
		Day3	19.44 +/- 0.04	16.71 +/- 0.06	16.43 +/- 0.03	17.64 +/- 0.07	19.27 +/- 0.05	15.32 +/- 0.07	15.55 +/- 0.06	17.34 +/- 0.04	19.99 +/- 0.06	19.51 +/- 0.06	13.62 +/- 0.04	14.31 +/- 0.07
	In vivo Trial 2	Day 0	19.47 +/- 0.08	16.71 +/- 0.07	16.45 +/- 0.07	17.62 +/- 0.07	19.15 +/- 0.04	15.41 /- 0.07	15.44 +/- 0.08	17.35 +/- 0.09	20.11 +/- 0.07	19.31 +/- 0.06	13.62 +/- 0.06	14.24 +/- 0.05
		Day1	19.44 +/- 0.05	16.69 +/- 0.05	16.39 +/- 0.08	17.49 +/- 0.07	19.25 +/- 0.05	15.50 +/- 0.08	15.5 +/- 0.09	17.29 +/- 0.08	20.04 +/- 0.04	19.43 +/- 0.06	13.57 +/- 0.07	14.35 +/- 0.04
		Day2	19.43 +/- 0.02	16.72 +/- 0.04	16.48 +/- 0.04	17.53 +/- 0.08	19.18 +/- 0.03	15.30 +/- 0.06	15.52 +/- 0.04	17.41 +/- 0.05	20.03 +/- 0.02	19.36 +/- 0.03	13.63 +/- 0.04	14.32 +/- 0.03
		Day3	19.45 +/- 0.09	16.75 +/- 0.06	16.49 +/- 0.03	17.64 +/- 0.05	19.22 +/- 0.051	15.52 +/- 0.06	15.45 +/- 0.05	17.39 +/- 0.04	20.28 +/- 0.07	19.40 +/- 0.07	13.50 +/- 0.05	14.27 +/- 0.02
	In vivo Trial 3	Day 0	19.47 +/- 0.04	16.81 +/- 0.04	16.37 +/- 0.03	17.66 +/- 0.08	19.22 +/- 0.05	15.55 +/- 0.10	15.38 +/- 0.08	17.53 +/- 0.02	20.13 +/- 0.08	19.42 +/- 0.06	13.71 +/- 0.08	14.34 +/- 0.08
		Day1	19.44 +/- 0.02	16.80 +/- 0.05	16.47 +/- 0.06	17.63 +/- 0.07	19.26 +/- 0.05	15.45 +/- 0.07	15.41 +/- 0.06	17.35 +/- 0.04	20.11 +/- 0.06	19.33 +/- 0.07	13.63 +/- 0.08	14.28 +/-0.06
		Day2	19.42 +/-0.02	16.78 +/- 0.06	16.42 +/- 0.03	17.59 +/- 0.03	19.16 +/- 0.03	15.32 +/- 0.05	15.33 +/-0.04	17.23 +/- 0.03	20.34 +/- 0.08	19.49 +/- 0.06	13.71 +/- 0.07	14.29 +/- 0.03
		Day3	19.45 +/- 0.03	16.67 +/- 0.05	16.46 +/- 0.02	17.45 +/- 0.06	19.21 +/- 0.02	15.42 +/- 0.06	15.38 +/- 0.05	17.54 +/- 0.05	20.28 +/- 0.06	19.37 +/- 0.05	13.82 +/- 0.04	14.34 +/- 0.07
